# Supplementary material
Source: PubMed Central journal article supplement (PMC4794048)

## Supplementary Appendix

**Supplementary Table A:** Overrepresented and underrepresented diseases among published RCTs.

| Disease                                                                   | Burden of Disease in 2010 GBD (10 <sup>6</sup> DALYs) | Number of Trials | Number of participants | Trials per 10 <sup>6</sup> DALY | Participants per 10 <sup>3</sup> DALYs |
|---------------------------------------------------------------------------|-------------------------------------------------------|------------------|------------------------|---------------------------------|----------------------------------------|
| <b>Top 5 over represented diseases</b>                                    |                                                       |                  |                        |                                 |                                        |
| Female infertility                                                        | 0.13                                                  | 18               | 5420                   | 143.7                           | 43.3                                   |
| Adverse medical treatment                                                 | 4.1                                                   | 59               | 15385                  | 14.5                            | 3.8                                    |
| Male infertility                                                          | 0.17                                                  | 2                | 350                    | 11.6                            | 2.0                                    |
| Peripheral vascular disease                                               | 0.99                                                  | 11               | 1281                   | 11.1                            | 1.3                                    |
| ADHD                                                                      | 0.49                                                  | 4                | 286                    | 8.1                             | 0.6                                    |
| <b>Top 5 under represented diseases with at least one trial performed</b> |                                                       |                  |                        |                                 |                                        |
| Neonatal sepsis                                                           | 44.2                                                  | 1                | 303                    | 0.023                           | 0.007                                  |
| RSV                                                                       | 20.5                                                  | 1                | 185                    | 0.049                           | 0.009                                  |
| Rotavirus                                                                 | 18.6                                                  | 1                | 80                     | 0.054                           | 0.004                                  |
| Self-harm                                                                 | 36.7                                                  | 2                | 44                     | 0.055                           | 0.001                                  |
| Neonatal encephalopathy                                                   | 50.1                                                  | 3                | 83                     | 0.060                           | 0.002                                  |

**Supplementary Table B.** Proportional trial evidence for 239 diseases included in the analysis.

| Disease                       | Burden of Disease in 2010 GBD (10 <sup>6</sup> DALYs) | Trials per 10 <sup>6</sup> DALY | Participants per 10 <sup>3</sup> DALYs |
|-------------------------------|-------------------------------------------------------|---------------------------------|----------------------------------------|
| 2-Wheel road injury           | 12.26613                                              | 0.1630506                       | 30.73504                               |
| 4-Wheel road injury           | 28.233306                                             | 0.1416766                       | 1.310509                               |
| Abortion                      | 2.137875                                              | 0.9355084                       | 80.45372                               |
| Acne vulgaris                 | 4.001774                                              | 1.749224                        | 59.72351                               |
| Acute hepatitis A             | 4.350753                                              | 0                               | 0                                      |
| Acute hepatitis B             | 4.674198                                              | 0                               | 0                                      |
| Acute hepatitis C             | 0.518024                                              | 0                               | 0                                      |
| Acute hepatitis E             | 3.714528                                              | 0                               | 0                                      |
| ADHD                          | 0.491466                                              | 8.138915                        | 581.9324                               |
| Adverse medical treatment     | 4.081823                                              | 14.45433                        | 3769.149                               |
| Alcohol use disorders         | 17.644107                                             | 0.4534092                       | 23.18054                               |
| Alopecia areata               | 1.352474                                              | 0.7393857                       | 73.93858                               |
| Alzheimer's disease           | 11.349286                                             | 0.4405563                       | 49.07798                               |
| Amoebiasis                    | 2.23698                                               | 0                               | 0                                      |
| Amphetamine use               | 2.616857                                              | 1.146413                        | 42.03516                               |
| Animal contact (non-venomous) | 0.929252                                              | 0                               | 0                                      |
| Animal contact (venomous)     | 2.729424                                              | 0                               | 0                                      |
| Anxiety disorders             | 26.825552                                             | 0.5218905                       | 54.42572                               |
| Aortic aneurysm               | 3.162603                                              | 0.6323905                       | 27.50899                               |
| Appendicitis                  | 1.483465                                              | 2.022292                        | 440.8597                               |
| Ascariasis                    | 1.31476                                               | 0                               | 0                                      |
| Asperger's                    | 3.659126                                              | 0                               | 0                                      |
| Assault by firearm            | 11.145549                                             | 0                               | 0                                      |
| Assault by other means        | 7.526365                                              | 0                               | 0                                      |
| Assault by sharp object       | 7.095015                                              | 0                               | 0                                      |
| Asthma                        | 22.459097                                             | 0.7569316                       | 122.801                                |
| Atrial fibrillation           | 3.598465                                              | 1.667378                        | 345.9809                               |
| Autism                        | 4.006692                                              | 0.7487473                       | 69.88309                               |
| Bacterial skin diseases       | 2.869052                                              | 0                               | 0                                      |
| Benign prostatic hyperplasia  | 6.834035                                              | 0.4389793                       | 31.60651                               |
| Bicycle road injury           | 4.645239                                              | 0                               | 0                                      |
| Bipolar disorder              | 12.867117                                             | 0.3885874                       | 54.40224                               |
| Bladder cancer                | 3.014549                                              | 0                               | 0                                      |
| Brain cancer                  | 6.059657                                              | 0.4950775                       | 34.82045                               |
| Breast cancer                 | 12.017906                                             | 2.246648                        | 936.9352                               |
| Campylobacter                 | 7.540956                                              | 0                               | 0                                      |
| Cannabis use                  | 2.057161                                              | 0.4861068                       | 77.77709                               |
| Cardiomyopathy                | 11.150769                                             | 0.986479                        | 173.4409                               |
| Cataract                      | 4.732057                                              | 1.479272                        | 282.3297                               |
| Cellulitis                    | 1.291503                                              | 0                               | 0                                      |
| Cervical cancer               | 6.439566                                              | 0.7764499                       | 223.9281                               |
| Chagas                        | 0.546257                                              | 0                               | 0                                      |
| Chlamydia                     | 0.714185                                              | 1.400197                        | 985.739                                |
| Cholera                       | 4.462747                                              | 0                               | 0                                      |
| Cirrhosis alcohol             | 8.574931                                              | 0.116619                        | 2.682237                               |
| Cirrhosis hepatitis B         | 8.989534                                              | 0.5562024                       | 81.20554                               |
| Cirrhosis hepatitis C         | 7.452314                                              | 0.805119                        | 47.50203                               |
| Cirrhosis other               | 6.010697                                              | 0                               | 0                                      |
| Cleft lip & palate            | 0.570507                                              | 0                               | 0                                      |
| Cocaine use                   | 1.110067                                              | 1.801693                        | 91.88634                               |
| Colorectal cancer             | 14.422303                                             | 0.8320447                       | 402.2936                               |
| Conduct disorder              | 5.75329                                               | 0                               | 0                                      |
| Congenital heart anomalies    | 15.457213                                             | 0                               | 0                                      |
| COPD                          | 76.731358                                             | 0.1563898                       | 9.487646                               |
| Cryptosporidiosis             | 8.372348                                              | 0                               | 0                                      |
| Cysticercosis                 | 0.50342                                               | 0                               | 0                                      |
| Decubitus ulcer               | 1.205652                                              | 0                               | 0                                      |
| Dengue                        | 0.824787                                              | 2.424869                        | 104.2693                               |
| Dental caries                 | 4.983849                                              | 0.2006481                       | 4.012963                               |
| Diabetes                      | 46.823256                                             | 1.324128                        | 141.1692                               |

|                            |           |           |          |
|----------------------------|-----------|-----------|----------|
| Diabetic CKD               | 4.674963  | 1.497338  | 1936.486 |
| Diphtheria                 | 0.235826  | 0         | 0        |
| Down's syndrome            | 1.774969  | 0         | 0        |
| Drowning                   | 19.741515 | 0         | 0        |
| Dysthymia                  | 11.084412 | 0         | 0        |
| Eating disorders           | 2.160635  | 1.851308  | 127.2774 |
| Echinococcosis             | 0.143935  | 0         | 0        |
| Eczema                     | 8.89681   | 0.674399  | 81.04028 |
| Edentulism                 | 4.62125   | 0.2163917 | 1.29835  |
| Encephalitis               | 7.140901  | 0         | 0        |
| Endocarditis               | 1.581748  | 0         | 0        |
| Endometriosis              | 0.544826  | 1.835448  | 587.3435 |
| Enteropathogenic E coli    | 7.542324  | 0         | 0        |
| Enterotoxigenic E coli     | 6.893812  | 0         | 0        |
| Epilepsy                   | 17.428592 | 0.1721309 | 2.180325 |
| Esophageal cancer          | 8.942658  | 0.3354707 | 37.23725 |
| Falls                      | 35.385079 | 0.1978235 | 39.4234  |
| Female infertility         | 0.125272  | 143.6873  | 43265.85 |
| Fibroids                   | 3.061566  | 0         | 0        |
| Fire                       | 19.009628 | 0         | 0        |
| Food-borne trematodiasis   | 1.875398  | 0.5332202 | 40.52473 |
| Forces of nature           | 13.386933 | 0.2240991 | 24.12801 |
| Fungal skin diseases       | 2.302796  | 0.4342547 | 30.39783 |
| G6PD deficiency            | 0.302587  | 0         | 0        |
| Gall bladder diseases      | 2.245056  | 4.454232  | 432.5059 |
| Gallbladder cancer         | 3.034467  | 0.3295472 | 27.02287 |
| Gastritis & duodenitis     | 1.196618  | 0.8356886 | 331.7684 |
| Genital prolapse           | 1.816629  | 0.5504701 | 33.02821 |
| Glaucoma                   | 0.943064  | 4.241494  | 379.6137 |
| Glomerulonephritis         | 3.684246  | 0         | 0        |
| Gonorrhoea                 | 0.282219  | 0         | 0        |
| Gout                       | 0.113977  | 0         | 0        |
| HiB meningitis             | 6.610643  | 0         | 0        |
| HiB pneumonia              | 21.315298 | 0         | 0        |
| HIV (other)                | 66.599553 | 0.2402419 | 104.34   |
| HIV-TB                     | 14.947814 | 0.0668994 | 47.63238 |
| Hodgkin's lymphoma         | 0.647046  | 0         | 0        |
| Hookworm                   | 3.230828  | 0.3095182 | 623.9886 |
| Hypertensive CKD           | 4.599471  | 0.4348326 | 36.30853 |
| Hypertensive heart disease | 15.324193 | 0         | 0        |
| Inflammatory bowel disease | 2.874986  | 1.739139  | 159.3051 |
| Influenza                  | 19.244148 | 0.6235662 | 567.5491 |
| Inguinal & femoral hernia  | 0.792083  | 1.262494  | 393.8981 |
| Intellectual disability    | 1.042686  | 1.918123  | 326.0809 |
| Interstitial lung diseases | 2.233179  | 0.4477921 | 5.821298 |
| Intestinal obstructions    | 3.728798  | 0         | 0        |
| Iodine deficiency          | 4.026746  | 0.2483395 | 50.90959 |
| Iron-deficiency anemia     | 45.338235 | 0.1985079 | 40.45151 |
| Ischemic heart disease     | 129.8199  | 0.4698817 | 83.53881 |
| Kidney cancers             | 3.676301  | 0.2720126 | 41.34591 |
| Larynx cancer              | 2.366619  | 0         | 0        |
| Leishmaniasis              | 3.316872  | 0         | 0        |
| Leprosy                    | 0.006062  | 0         | 0        |
| Leukemia                   | 9.555732  | 0.7325446 | 82.77754 |
| Liver cancer alcohol       | 3.781619  | 0         | 0        |
| Liver cancer hepatitis B   | 8.937873  | 0.4475338 | 50.6832  |
| Liver cancer hepatitis C   | 4.141073  | 0.7244499 | 47.33073 |
| Liver cancer other         | 2.250275  | 0         | 0        |
| Low back pain              | 83.063498 | 0.1685458 | 13.07434 |
| Lung cancer                | 32.404655 | 0.1851586 | 18.70102 |
| Lymphatic filariasis       | 2.774687  | 0         | 0        |
| Macular degeneration       | 1.329288  | 4.513695  | 2002.576 |
| Major depressive disorder  | 63.179254 | 0.4906674 | 61.23846 |
| Malaria                    | 82.685191 | 0.1209406 | 104.0089 |
| Male infertility           | 0.172724  | 11.57917  | 2026.354 |

|                                |           |           |          |
|--------------------------------|-----------|-----------|----------|
| Maternal hemorrhage            | 3.289193  | 0.3040259 | 24.32207 |
| Maternal hypertension          | 2.797477  | 0         | 0        |
| Maternal sepsis                | 1.308766  | 0         | 0        |
| Measles                        | 10.419744 | 0         | 0        |
| Mechanical forces (firearm)    | 4.624455  | 0.2162417 | 9.947118 |
| Melanoma                       | 1.169439  | 3.420444  | 843.1393 |
| Meningococcal                  | 5.16341   | 0         | 0        |
| Migraine                       | 22.362326 | 0.1341542 | 16.32209 |
| Mouth cancer                   | 3.227847  | 0.309804  | 17.03922 |
| Multiple sclerosis             | 1.075184  | 3.720294  | 245.5394 |
| Myeloma                        | 1.474772  | 1.356142  | 184.4353 |
| Nasopharynx cancer             | 2.007443  | 1.992585  | 269.4971 |
| Neck pain                      | 33.640233 | 0.1189052 | 15.39823 |
| Neonatal encephalopathy        | 50.149575 | 0.059821  | 1.655049 |
| Neonatal sepsis                | 44.236491 | 0.0226058 | 6.849549 |
| Neural tube defects            | 6.372372  | 0         | 0        |
| Non-Hodgkin lymphoma           | 5.859806  | 0.8532706 | 265.7085 |
| Non-melanoma skin cancer       | 0.79838   | 0         | 0        |
| Obstructed labor               | 1.792401  | 1.673733  | 470.8768 |
| Onchocerciasis                 | 0.494038  | 0         | 0        |
| Opioid use                     | 9.151516  | 0.3278145 | 44.47351 |
| Osteoarthritis                 | 17.135221 | 1.984217  | 163.6979 |
| Other cancers                  | 16.615309 | 0.1203709 | 112.9681 |
| Other cardio & circulatory     | 17.021033 | 0.9400135 | 331.5898 |
| Other chromosomal anomalies    | 1.760893  | 0         | 0        |
| Other CKD                      | 11.876894 | 1.768139  | 661.9576 |
| Other congenital anomalies     | 12.951329 | 0         | 0        |
| Other diarrheal diseases       | 21.915816 | 0.0912583 | 14.41881 |
| Other digestive diseases       | 10.197014 | 1.569087  | 155.2415 |
| Other drug use                 | 5.058556  | 0.3953697 | 27.4782  |
| Other endocrine                | 11.357643 | 1.937022  | 294.1631 |
| Other gynecological disorders  | 0.704975  | 5.67396   | 726.2669 |
| Other hearing loss             | 15.760566 | 0.126899  | 11.16711 |
| Other hemog                    | 3.979473  | 0.5025791 | 96.99776 |
| Other infectious diseases      | 17.715475 | 0.1128956 | 9.483234 |
| Other lower respiratory        | 27.288583 | 0.1465814 | 86.9228  |
| Other maternal disorders       | 4.778155  | 1.465001  | 218.4944 |
| Other mechanical forces        | 7.097469  | 0.5635812 | 27.0519  |
| Other meningitis               | 9.563333  | 0         | 0        |
| Other mental & behavioral      | 1.482111  | 18.21726  | 3703.501 |
| Other musculoskeletal          | 30.856331 | 1.425963  | 183.9817 |
| Other neonatal disorders       | 30.591125 | 0.0326892 | 6.733979 |
| Other neurological disorders   | 17.869337 | 1.231159  | 131.6221 |
| Other NTD                      | 4.724286  | 0         | 0        |
| Other nutritional deficiencies | 0.294673  | 30.54233  | 3939.96  |
| Other pharynx cancer           | 2.741908  | 0         | 0        |
| Other respiratory diseases     | 13.940006 | 0.9325678 | 108.8952 |
| Other road injury              | 5.974351  | 0         | 0        |
| Other sense organ disorders    | 0.135503  | 125.4585  | 17158.29 |
| Other skin diseases            | 4.972765  | 2.815335  | 133.3262 |
| Other STDs                     | 0.235993  | 0         | 0        |
| Other transport injuries       | 6.095578  | 0         | 0        |
| Other unintentional injuries   | 18.368597 | 0.4355259 | 15.29785 |
| Other urinary diseases         | 2.295725  | 8.276253  | 1082.011 |
| Other vision loss              | 6.239985  | 0.1602568 | 6.410272 |
| Otitis media                   | 4.680034  | 0         | 0        |
| Ovarian cancer                 | 4.118191  | 0.9713002 | 92.51635 |
| Pancreatic cancer              | 6.160582  | 0.3246447 | 31.81518 |
| Pancreatitis                   | 2.354034  | 1.274408  | 77.31409 |
| Parkinson's disease            | 1.91806   | 4.170881  | 201.245  |
| Pedestrian road injury         | 25.636008 | 0         | 0        |
| Peptic ulcer                   | 6.718099  | 0.4465549 | 125.9285 |
| Periodontal disease            | 5.410094  | 2.772595  | 136.4117 |
| Peripheral vascular disease    | 0.994927  | 11.05609  | 1287.532 |
| Pneumococcal meningitis        | 8.023761  | 0         | 0        |

|                               |           |           |          |
|-------------------------------|-----------|-----------|----------|
| Pneumococcal pneumonia        | 26.906232 | 0.0743322 | 18.02556 |
| Pneumoconiosis                | 2.581591  | 0         | 0        |
| Poisonings                    | 8.933867  | 0.1119336 | 4.02961  |
| Polycystic ovary              | 2.755776  | 0         | 0        |
| Premenstrual syndrome         | 1.248597  | 0         | 0        |
| Preterm birth complications   | 76.981719 | 0.2208316 | 46.14082 |
| Prostate cancer               | 3.786622  | 2.640876  | 785.1325 |
| Protein-energy malnutrition   | 34.874497 | 0.0860227 | 11.44102 |
| Pruritus                      | 2.086447  | 0         | 0        |
| Psoriasis                     | 1.058735  | 1.889047  | 248.4097 |
| Pyelonephritis & UTI          | 3.107507  | 1.930808  | 2590.501 |
| Rabies                        | 1.46226   | 0         | 0        |
| Refraction disorders          | 5.593023  | 0.8939709 | 65.08109 |
| Rheumatic heart disease       | 10.149866 | 0.0985235 | 8.473019 |
| Rheumatoid arthritis          | 4.814764  | 1.869251  | 503.2438 |
| Rotavirus                     | 18.649674 | 0.0536202 | 4.289619 |
| RSV pneumonia                 | 20.472377 | 0.0488463 | 9.036567 |
| Salmonella                    | 4.846654  | 0         | 0        |
| Scabies                       | 1.579681  | 0         | 0        |
| Schistosomiasis               | 3.308963  | 0         | 0        |
| Schizophrenia                 | 14.999473 | 1.266711  | 82.00288 |
| Self-harm                     | 36.654294 | 0.0545639 | 1.200405 |
| Shigellosis                   | 7.051798  | 0         | 0        |
| Sickle cell                   | 5.641008  | 0.1772733 | 15.60005 |
| SIDS                          | 1.892841  | 0         | 0        |
| Stomach cancer                | 16.412709 | 0.1827852 | 12.24661 |
| Stroke                        | 102.2323  | 0.1956329 | 11.91404 |
| Syphilis                      | 9.578123  | 0         | 0        |
| Tension-type headache         | 1.778681  | 0         | 0        |
| Testicular cancer             | 0.313269  | 0         | 0        |
| Tetanus                       | 4.663339  | 0         | 0        |
| Thalassemia                   | 5.716739  | 0         | 0        |
| Thyroid cancer                | 0.8363    | 2.391486  | 96.85519 |
| Trachoma                      | 0.334401  | 0         | 0        |
| Trichomoniasis                | 0.16711   | 0         | 0        |
| Trichuriasis                  | 0.638186  | 0         | 0        |
| Trypanosomiasis               | 0.560281  | 0         | 0        |
| Tuberculosis                  | 49.396246 | 0.0607334 | 5.526736 |
| Typhoid fevers                | 12.238564 | 0         | 0        |
| Upper respiratory infections  | 1.866265  | 4.286637  | 1231.872 |
| Urolithiasis                  | 1.113321  | 3.592854  | 342.2194 |
| Urticaria                     | 2.599596  | 0.3846751 | 33.85141 |
| Uterine cancer                | 1.271911  | 0         | 0        |
| Varicella                     | 0.581053  | 0         | 0        |
| Vascular intestinal disorders | 1.100471  | 0.9087018 | 78.14835 |
| Viral skin diseases           | 2.730778  | 0         | 0        |
| Vitamin A deficiency          | 0.806402  | 1.240076  | 33.48206 |
| War & legal intervention      | 0.959771  | 0         | 0        |
| Whooping cough                | 7.018086  | 0         | 0        |

**Supplementary Table C.** Linear regression analysis of the log-transformed number of trials and log-transformed number of participants randomized using log-transformed total DALYs and the log transformed ratio of DALYs in low-income regions to high-income regions as predictors. Univariable analysis with log(total DALYs) indicates a poor association between number of trials (Model 1.  $R^2 = 0.14$ ) and number of participants (Model 3.  $R^2 = 0.11$ )

|                                                                         | (1)<br><b>Log(Trials+1)</b>  | (2)<br><b>Log(Trials+1)</b>   | (3)<br><b>Log(Participants+1)</b> | (4)<br><b>Log(Participants+1)</b> |
|-------------------------------------------------------------------------|------------------------------|-------------------------------|-----------------------------------|-----------------------------------|
| <b>Coefficients (SE, p-value)<sup>1</sup></b>                           |                              |                               |                                   |                                   |
| <b>Log(DALYs)</b>                                                       | 0.276 (SE 0.044,<br>p<0.001) | 0.265 (SE 0.041,<br>p<0.001)  | 0.749 (SE 0.136,<br>p<0.001)      | 0.713 (0.127,<br>p<0.001)         |
| <b>Log(Ratio of DALYs in Low-income Regions to High-income Regions)</b> |                              | -0.121 (SE 0.020,<br>p<0.001) |                                   | -0.382 (0.062,<br>p<0.001)        |
| Observations                                                            | 239                          | 239                           | 239                               | 239                               |
| R-squared                                                               | 0.14                         | 0.26                          | 0.11                              | 0.24                              |

<sup>1</sup>Results are regression coefficients with standard errors and p-values in brackets.

**Supplementary Table D.** Sensitivity regression analysis of the log-transformed number of trials and log-transformed number of participants randomized using log-transformed total DALYs and ratio of DALYs in low income regions to high income regions as predictors. No offset of 1 was added and diseases with no trials were excluded.

|                                                                         | (1)                          | (2)                           | (3)                          | (4)                        |
|-------------------------------------------------------------------------|------------------------------|-------------------------------|------------------------------|----------------------------|
| <b>Coefficients (SE, p-value)<sup>1</sup></b>                           |                              |                               |                              |                            |
|                                                                         | <b>Log(Trials)</b>           | <b>Log(Trials)</b>            | <b>Log(Participants)</b>     | <b>Log(Participants)</b>   |
| <b>Log(DALYs)</b>                                                       | 0.233 (SE 0.062,<br>p<0.001) | 0.269 (SE 0.061,<br>p<0.001)  | 0.240 (SE 0.092,<br>p=0.010) | 0.254 (0.094,<br>p=0.007)  |
| <b>Log(Ratio of DALYs in Low-income Regions to High-income Regions)</b> |                              | -0.119 (SE 0.041,<br>p<0.001) |                              | -0.048 (0.063,<br>p=0.448) |
| Observations                                                            | 144                          | 144                           | 144                          | 144                        |
| R-squared                                                               | 0.09                         | 0.13                          | 0.05                         | 0.05                       |

<sup>1</sup>Results are regression coefficients with standard errors and p-values in brackets.

**Supplementary Figure A.** Participants per million DALYs for 239 diseases, classified into high-income, high-equal, low-equal and low-income diseases. (A) Participants per million DALYs for diseases predominant in high-income regions (top) to diseases predominant in low-income regions (bottom). (B) Variation of trials per million DALYs within disease-income categories. Note that scale on (B) is five times greater than that on (A).

**A.**

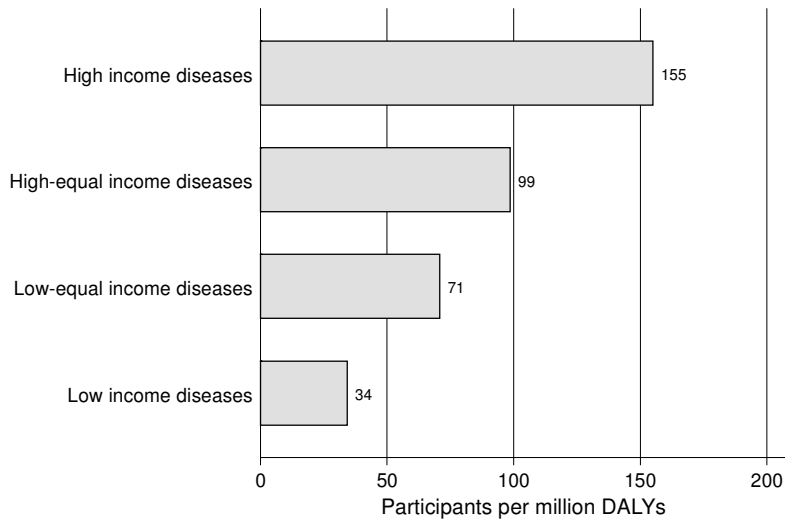

**B.**

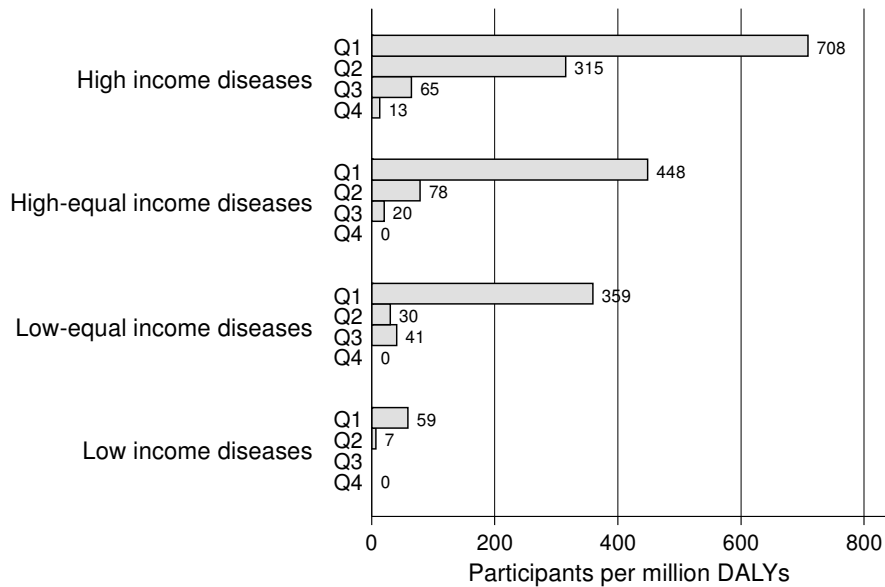



**Supplementary Figure B.** A. Number of randomized participants per one million population for ten regions. B. Number of randomized participants per one million DALYs for ten regions. C. Spearman's correlation coefficient between burden of disease (total DALYs in each region) and number of trials conducted for ten regions.

**A.**

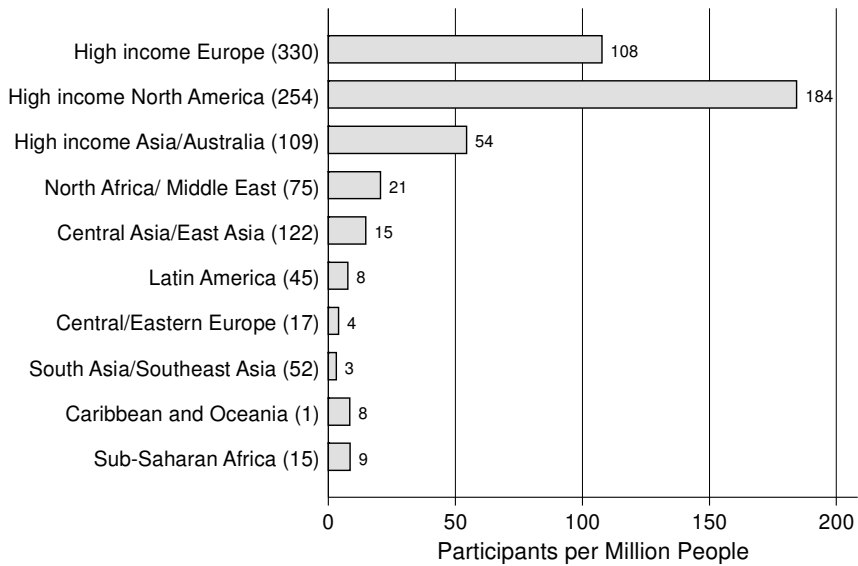

**B.**

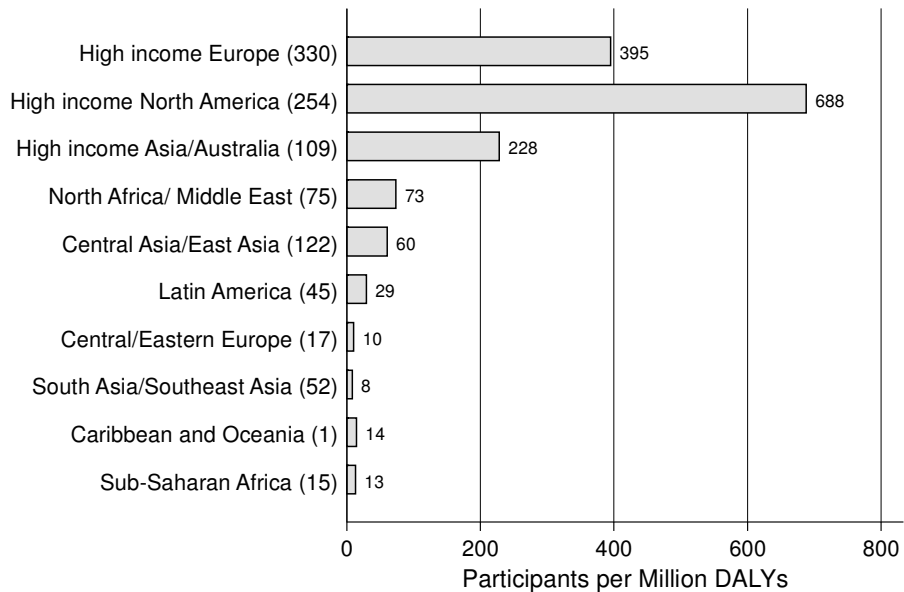

C.

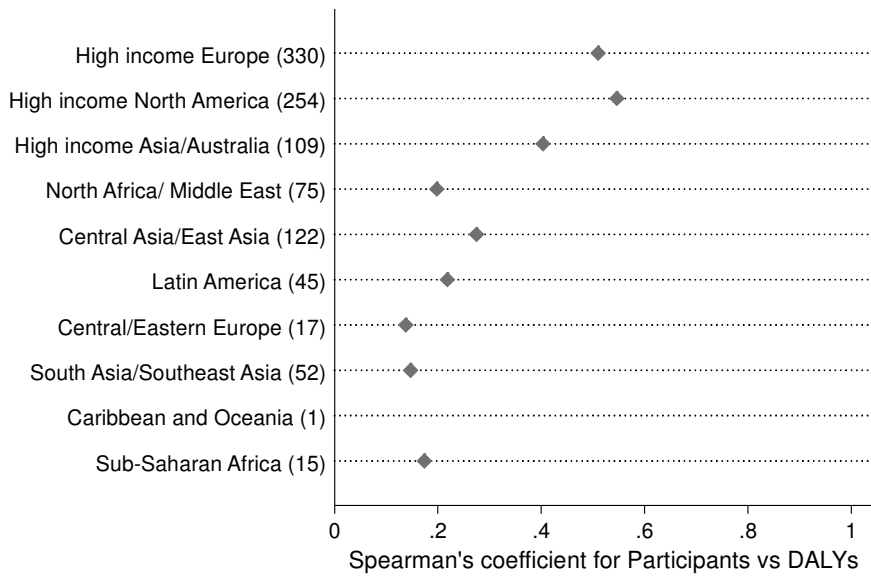

Supplement: emdc021972.ww1_default.pdf [file emdc021972.ww1_default.pdf]
